# Supplementary material
Source: publisher figshare collection journal article supplement (https://gsajournals.figshare.com/articles/dataset/_/12472121)
Supplement: Supplementary file 1 [file 2]

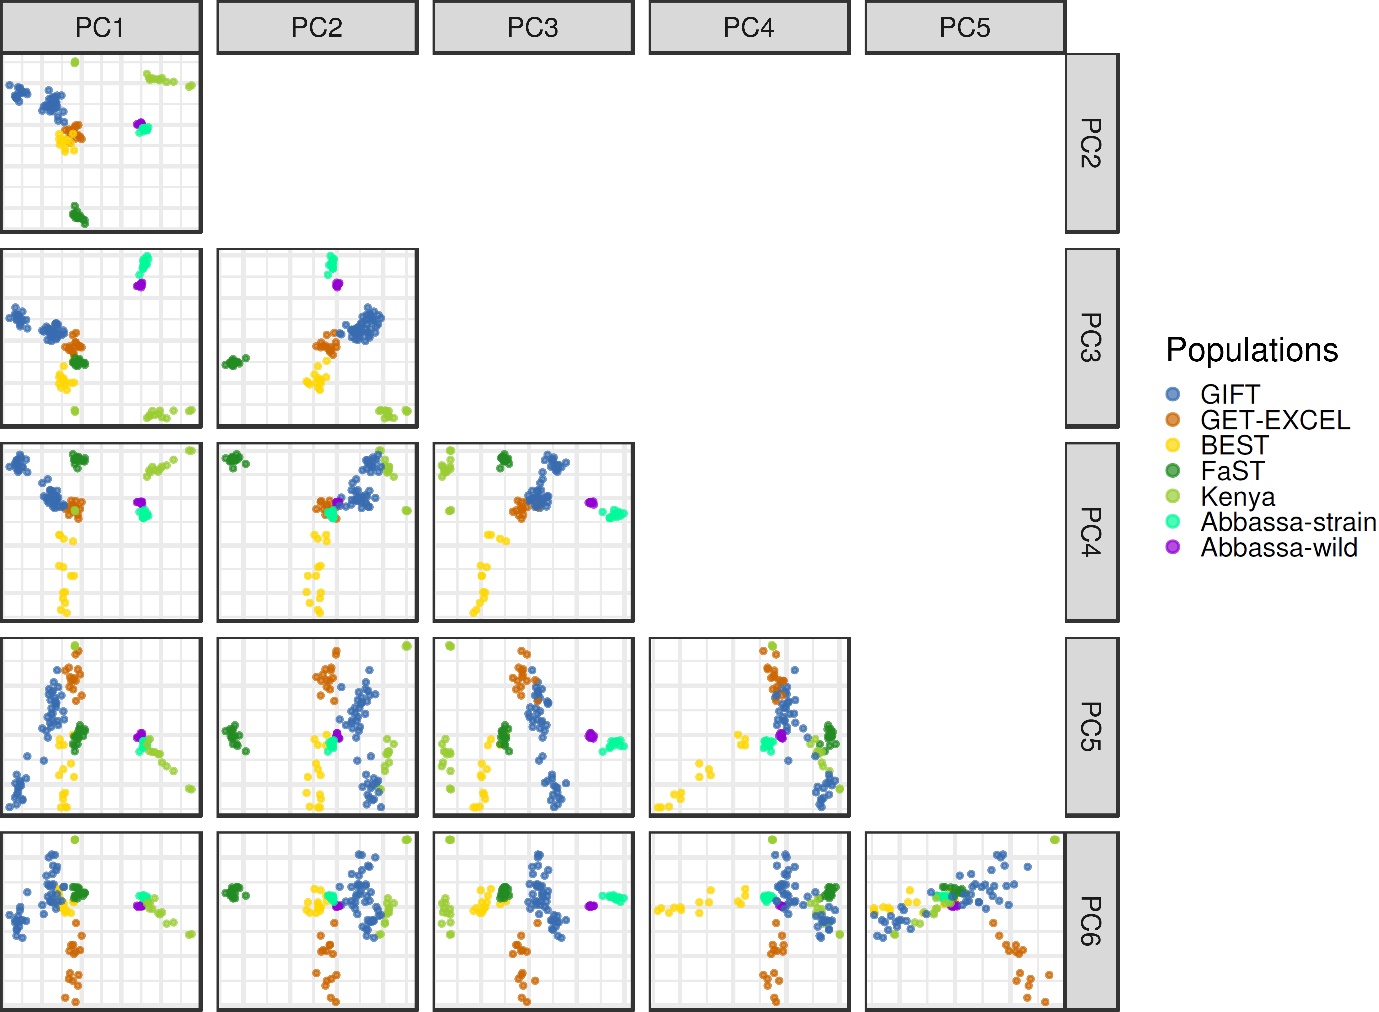


**Figure S2.** Pairwise scatter plots of the first six principal components from the PCA of the genome-wide SNP data obtained from the ~65K SNP array. The total number of individuals (dots) is 125. Each dot is colour coded according to its origin, as shown in the key to the right.
